# Supplementary material for: Nano-topographical surface engineering for enhancing bioactivity of PEEK implants (in vitro—histomorphometric study)
Source: Springer Nature journal article supplement (doi:10.1007/s00784-023-05291-w), 2023-10-17
Supplement: MOESM1 [file 26190784]

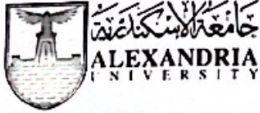

**ALEXU-IACUC**  
Institutional Animal Care and Use Committee

Member of ICLAS

<http://iclas.org/members/member-list>

**Review Report**

| AU | Code of faculty | yy | mm | dd | MS (1) – MD (2) – research (3) - project (4) | Daily serial |
|----|-----------------|----|----|----|----------------------------------------------|--------------|
|    | 11              | 19 | 07 | 14 | 3                                            | \            |

**Date of monthly meeting:** 14 / 7 / 2019

**Name of the researcher:** Dawlat Mostafa Ahmed

**Name of Department :** Dental Biomaterials Department

**Type of research:** MS  MD  Promotion research

**Title of the research:** Nano-Topographical Surface Engineering for Enhancing Bioactivity of PEEK Implants (In vitro – Histomorphometric Study)

**Reviewer report:**

**Accepted according to ethical standards of scientific research**

**Accepted after correction**  **not accepted**

**Chairperson of AU-IACUC**

Prof Maha Ghanem

**Chairperson of local IACUC**

Prof Dr. Maha Abd Elaziz Abou Khadr

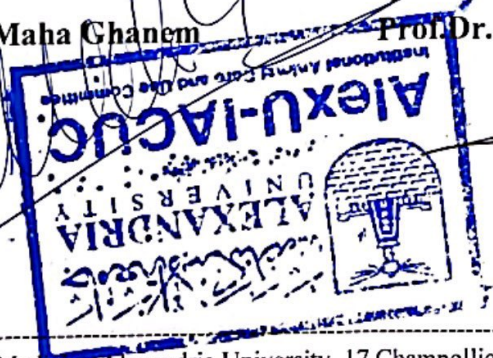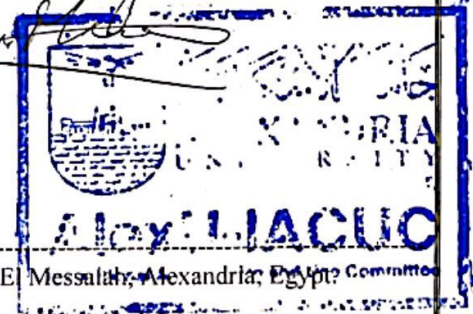

**Address:** Faculty of Medicine Alexandria University, 17 Champollion Street, El Messara, Alexandria, Egypt

**Web site:**

**Email:**

**Email:**

**Email:**
